# Supplementary material
Source: PubMed Central journal article supplement (PMC535847)
Supplement: plntphys_pp.104.047233_1.pdf [file plntphys_pp.104.047233_1.pdf]

Supplement Table 1: Analysis of COS markers in the vicinity of homologous tomato and *Arabidopsis* iron uptake genes. Tomato COS marker amino acid sequences were used to identify *Arabidopsis* homologs using BLASTP at <http://www.arabidopsis.org/Blast/>. *Arabidopsis* COS markers were marked by the same colours as the respective iron uptake gene homologs if they were located within +/- 400 genes (ca. +/- 2Mb) from them (for *Arabidopsis* iron uptake gene colours see Table 1). For example COS marker T1654-At1g29520 has the same colour as At1g31260-*ZIP10*, whereas T1105-At5g43280 has the same colour as At5g45105-*ZIP8*.

| Iron uptake tomato gene | COS marker within 10 cM distance of iron uptake tomato gene | <i>Arabidopsis</i> protein with sequence similarity to encoded protein of tomato COS marker | E-value of BLASTP alignment search (TAIR website) | Score (bits) |
|-------------------------|-------------------------------------------------------------|---------------------------------------------------------------------------------------------|---------------------------------------------------|--------------|
| <i>LeIRT1, LeIRT2</i>   | T1516                                                       | At2g34460                                                                                   | 2e-032                                            | 135          |
| <i>c2</i>               | T1654                                                       | At1g29520                                                                                   | 6e-060                                            | 227          |
|                         |                                                             | At5g18970                                                                                   | 8e-028                                            | 120          |
|                         |                                                             | At1g04560                                                                                   | 1e-023                                            | 106          |
|                         | T1105                                                       | At5g43280                                                                                   | 7e-071                                            | 263          |
|                         | T1227                                                       | At5g63890                                                                                   | 1e-045                                            | 179          |
|                         | T1238                                                       | At4g34280                                                                                   | 8e-034                                            | 140          |
|                         | T1256                                                       | At2g34560                                                                                   | 7e-062                                            | 233          |
|                         |                                                             | At1g80350                                                                                   | 4e-035                                            | 145          |
|                         |                                                             | At2g27600                                                                                   | 1e-028                                            | 123          |
|                         |                                                             | At3g27120                                                                                   | 2e-024                                            | 109          |
|                         | T1361                                                       | At2g35130                                                                                   | 3e-059                                            | 225          |
|                         | T1523                                                       | At4g10730                                                                                   | 6e-066                                            | 247          |
|                         |                                                             | At4g24100                                                                                   | 7e-064                                            | 240          |
|                         | T1616                                                       | At3g08010                                                                                   | 1e-099                                            | 359          |
|                         | T1549                                                       | At2g40840                                                                                   | 4e-040                                            | 161          |
|                         | T1668                                                       | At4g20410                                                                                   | 1e-041                                            | 166          |
|                         | T1683                                                       | At3g19820                                                                                   | 1e-106                                            | 382          |
|                         | T1698                                                       | At5g45020                                                                                   | 8e-082                                            | 300          |
|                         |                                                             | At5g44990                                                                                   | 4e-079                                            | 291          |
|                         |                                                             | At4g19880                                                                                   | 5e-044                                            | 174          |
|                         |                                                             | At5g44000                                                                                   | 3e-027                                            | 118          |
|                         | T1706                                                       | At3g02100                                                                                   | 4e033                                             | 138          |
|                         | T1768                                                       | At1g78690                                                                                   | 4e-059                                            | 224          |
|                         |                                                             | At3g05510                                                                                   | 8e-022                                            | 100          |
|                         | CLEC27M9                                                    | At2g18790                                                                                   | 1e-057                                            | 219          |
|                         |                                                             | At4g16250                                                                                   | 1e-053                                            | 206          |
|                         |                                                             | At1g09570                                                                                   | 1e050                                             | 196          |
|                         |                                                             | At4g18130                                                                                   | 1e-050                                            | 194          |
|                         |                                                             | At5g35840                                                                                   | 2e-043                                            | 172          |
|                         | CLPT2K20                                                    | At1g31160                                                                                   | 5e-052                                            | 201          |
|                         |                                                             | At3g56490                                                                                   | 3e-047                                            | 185          |
|                         | CLPT1E8                                                     | At1g29660                                                                                   | 1e-063                                            | 240          |
|                         |                                                             | At1g29670                                                                                   | 2e-063                                            | 239          |
|                         |                                                             | At5g45670                                                                                   | 3e-061                                            | 231          |
|                         |                                                             | At4g18970                                                                                   | 4e-060                                            | 228          |
|                         |                                                             | At1g33811                                                                                   | 2e-058                                            | 222          |
|                         |                                                             | At2g19010                                                                                   | 3e-051                                            | 198          |
|                         | T963                                                        | At4g07390                                                                                   | 3e-024                                            | 108          |
|                         |                                                             | At5g59470                                                                                   | 1e-022                                            | 103          |
|                         | T984                                                        | At1g30580                                                                                   | 1e-103                                            | 371          |
|                         |                                                             | At1g56050                                                                                   | 5e-043                                            | 171          |
|                         | T888                                                        | At2g23090                                                                                   | 3e-030                                            | 128          |
|                         | T829                                                        | At5g08580                                                                                   | 6e-031                                            | 131          |
|                         | T123                                                        | At2g30490                                                                                   | 3e-050                                            | 194          |
|                         | T114                                                        | At1g12900                                                                                   | 2e-083                                            | 305          |
|                         |                                                             | At3g26650                                                                                   | 4e-083                                            | 304          |
|                         |                                                             | At1g42970                                                                                   | 3e-068                                            | 254          |

|                 |           |           |        |     |
|-----------------|-----------|-----------|--------|-----|
| <i>LeNRAMP1</i> | T1161     | At1g21690 | 4e-071 | 263 |
| c11             |           | At1g77470 | 2e-033 | 138 |
|                 |           | At1g63160 | 1e-032 | 136 |
|                 | CLEX4G10  | At1g34300 | 2e-045 | 178 |
|                 | T1460     | At3g06980 | 3e-086 | 314 |
|                 | T1046     | At2g26980 | 1e-063 | 239 |
|                 |           | At5g21326 | 8e-063 | 236 |
|                 | T1648     | At2g36870 | 2e-023 | 104 |
|                 | T1071     | At5g22860 | 9e-042 | 166 |
|                 |           | At2g24280 | 1e-030 | 129 |
|                 |           | At5g65760 | 1e-025 | 113 |
|                 | T1787     | At2g27920 | 2e-073 | 272 |
|                 |           | At1g15000 | 3e-022 | 102 |
|                 | T1014     | At4g21110 | 5e-077 | 284 |
|                 | CLET10011 | At2g27290 | 1e-054 | 210 |
|                 | T675      | At1g77670 | 2e-080 | 295 |
| <i>LeNRAMP3</i> | CLED19B24 | At3g52560 | 6e-052 | 200 |
| c2              |           | At2g36060 | 5e-049 | 190 |
|                 |           | At1g70660 | 1e-038 | 155 |
|                 |           | At1g23260 | 2e-038 | 155 |
|                 | T1475     | At3g01480 | 8e-035 | 143 |
|                 | T1003     | At3g27925 | 2e-092 | 335 |
|                 |           | At5g39830 | 3e-048 | 188 |
|                 |           | At4g18370 | 5e-038 | 154 |
|                 | CLET5L17  | At3g02090 | 4e-072 | 267 |
|                 | T1480     | At5g15450 | 3e-071 | 265 |
|                 |           | At2g25140 | 6e-061 | 230 |
|                 | CLEC7L24  | At3g02200 | 4e-055 | 210 |
|                 |           | At5g15610 | 8e-054 | 206 |
|                 | CLEX15F2  | At1g69120 | 5e-067 | 250 |
|                 |           | At1g26310 | 9e-065 | 243 |
|                 |           | At5g60910 | 2e-061 | 232 |
|                 | T1158     | At5g38710 | 3e-060 | 228 |
|                 |           | At3g30775 | 1e-059 | 226 |
|                 | T1076     | At3g02300 | 1e-044 | 175 |
|                 | CTOB9L18  | At1g19310 | 9e-046 | 180 |
|                 |           | At2g23780 | 2e-044 | 175 |
|                 |           | At1g74990 | 6e-034 | 140 |
|                 | T1744     | At2g26560 | 2e-038 | 155 |
|                 |           | At4g37070 | 9e-038 | 153 |
|                 |           | At4g37060 | 7e-037 | 150 |
|                 |           | At5g43590 | 6e-032 | 134 |
|                 | T1440     | At1g23740 | 2e-047 | 185 |
|                 | T634      | At5g67370 | 2e-072 | 268 |
|                 | T723      | At2g04700 | 3e-035 | 144 |
|                 | T680      | At2g32980 | 4e-084 | 307 |
|                 | T628      | At3g01500 | 2e-055 | 211 |
|                 |           | At5g14740 | 1e-053 | 205 |
|                 |           | At1g70410 | 2e-041 | 165 |
|                 |           | At1g23730 | 6e-039 | 156 |
|                 |           | At4g33580 | 3e-024 | 108 |
|                 | CLER17N11 | At5g65700 | 4e-060 | 227 |
|                 |           | At3g49670 | 1e-051 | 198 |
|                 | CTOB6I3   | At3g01640 | 3e-095 | 344 |
|                 |           | At5g14470 | 7e-089 | 323 |
|                 | T1096     | At5g40810 | 4e-093 | 337 |
|                 |           | At3g27240 | 1e-092 | 336 |
|                 | T1566     | At3g01910 | 4e-091 | 331 |
|                 | T1202     | At5g41120 | 1e-049 | 192 |
|                 |           | At5g41130 | 2e-047 | 185 |

|                       |              |                  |               |            |
|-----------------------|--------------|------------------|---------------|------------|
|                       |              | At3g26840        | 6e-045        | 177        |
|                       |              | At1g54570        | 1e-037        | 153        |
|                       |              | At3g26820        | 1e-037        | 152        |
|                       | T1323        | At1g08660        | 1e-078        | 289        |
|                       |              | At3g48820        | 2e-036        | 148        |
|                       | T1554        | At3g26730        | 4e-033        | 138        |
|                       | CLEF2A11     | At5g14040        | 1e-094        | 342        |
|                       |              | At3g48850        | 4e-078        | 287        |
|                       |              | At2g17270        | 9e-052        | 200        |
|                       | T706         | At4g37560        | 4e-065        | 243        |
|                       |              | At4g37550        | 9e-060        | 226        |
|                       | T347         | At3g02300        | 5e-048        | 187        |
| <b>LeFRO-TC124302</b> | <b>T1119</b> | <b>At3g01150</b> | <b>2e-047</b> | <b>185</b> |
| c3                    |              | At5g53180        | 2e-060        | 228        |
|                       | CLEC37C6     | At3g55770        | 9e-039        | 156        |
|                       |              | At1g01780        | 3e-033        | 138        |
|                       |              | At2g39900        | 2e-037        | 152        |
|                       | T1086        | At2g17570        | 3e-052        | 201        |
|                       | T1321        | At4g23030        | 1e-052        | 202        |
|                       |              | At1g11545        | 1e-044        | 175        |
|                       |              | At5g52050        | 8e-040        | 159        |
|                       |              | At4g29140        | 2e-037        | 151        |
|                       |              | At5g19700        | 2e-036        | 148        |
|                       | T1131        | At1g11545        | 3e-055        | 211        |
|                       | T1540        | At5g23940        | 6e-058        | 220        |
|                       | CLPT2E21     | At5g07270        | 1e-098        | 356        |
|                       |              | At5g57740        | 5e-055        | 211        |
|                       | CLEZ17J15    | At5g65700        | 5e-079        | 290        |
|                       |              | At3g49670        | 8e-077        | 283        |
|                       |              | At1g75820        | 2e-058        | 222        |
|                       |              | At4g20270        | 2e-057        | 218        |
|                       | T1758        | At1g29260        | 6e-071        | 263        |
|                       | CLEC100I8    | At1g12240        | 9e-047        | 183        |
|                       |              | At1g62660        | 2e-046        | 182        |
|                       | CLPT5E3      | At5g52990        | 8e-017        | 835        |
|                       | T1001        | At1g29260        | 8e-053        | 203        |
|                       | T1424        | At5g24460        | 4e-064        | 241        |
|                       | T1200        | At2g40760        | 5e-058        | 220        |
|                       | T1017        | At1g47570        | 7e-024        | 107        |
|                       | CTOB8I8      | At1g66180        | 7e-053        | 203        |
|                       |              | At5g37540        | 2e-052        | 201        |
|                       | T1155        | At5g51150        | 2e-079        | 291        |
|                       | CLET24J2     | At1g12310        | 5e-070        | 260        |
|                       |              | At1g62820        | 2e-069        | 258        |
|                       | T677         | At4g21190        | 1e-061        | 233        |
|                       |              | At4g18975        | 3e-027        | 294        |
|                       | T613         | At2g42220        | 6e-040        | 160        |
|                       | T648         | At5g51540        | 7e-022        | 101        |
|                       | T522         | At3g05500        | 2e-034        | 142        |
|                       | T632         | At4g37000        | 5e-052        | 201        |
|                       | T685         | At4g34670        | 1e-062        | 236        |
|                       |              | At3g04840        | 5e-062        | 234        |
|                       | T536         | At3g22320        | 3e-067        | 250        |
|                       | T518         | At2g40360        | 2e-030        | 127        |
|                       | T753         | At5g52390        | 4e-028        | 120        |
|                       |              | At3g54040        | 3e-024        | 108        |
|                       | T827         | At3g52180        | 2e-036        | 148        |
|                       | T772         | At3g48420        | 2e-035        | 144        |
|                       | T1278        | At5g50320        | e-107         | 384        |
|                       | T1331        | At3g17670        | e-027         | 120        |

|                              |          |           |        |     |
|------------------------------|----------|-----------|--------|-----|
|                              | T1429    | At5g23670 | 1e-105 | 379 |
|                              |          | At3g48780 | 1e-104 | 373 |
|                              |          | At3g48790 | 4e-088 | 321 |
|                              | T1608    | At5g17510 | 7e-055 | 210 |
|                              |          | At3g03460 | 6e-045 | 177 |
|                              | T1511    | At4g20360 | 6e-050 | 193 |
|                              |          | At4g02930 | 4e-031 | 131 |
|                              | T1659    | At1g05350 | 2e-042 | 168 |
| <i>LeFRO1/LeFRO-TC129233</i> | CLES5J1  | At2g45740 | 5e-038 | 153 |
| c1                           |          | At1g01820 | 3e-037 | 151 |
|                              |          | At3g61070 | 1e-036 | 149 |
|                              | T1409    | At4g00410 | 4e-070 | 261 |
|                              |          | At1g01610 | 3e-069 | 257 |
|                              |          | At2g38110 | 4e-054 | 207 |
|                              | T1228    | At1g58350 | 9e-096 | 346 |
|                              |          | At1g09980 | 3e-042 | 168 |
|                              | T1173    | At1g20200 | 9e-077 | 283 |
|                              |          | At1g75990 | 2e-075 | 279 |
|                              | CLED1515 | At3g61610 | 4e-089 | 324 |
|                              |          | At4g23730 | 4e-082 | 300 |
|                              |          | At5g57330 | 2e-079 | 292 |
|                              |          | At3g01590 | 1e-068 | 256 |
|                              |          | At5g14500 | 9e-068 | 253 |
|                              |          | At4g25900 | 1e-053 | 206 |
|                              | T1327    | At1g01300 | 2e-076 | 281 |
|                              |          | At3g61820 | 5e-068 | 254 |
|                              | T1649    | At3g27890 | 1e-041 | 165 |
|                              | CLPT1K7  | At5g13750 | 5e-072 | 267 |
|                              |          | At5g13740 | 5e-063 | 237 |
|                              |          | At3g43790 | 2e-054 | 209 |
|                              | CLPT4D13 | At3g04820 | 2e-072 | 269 |
|                              | T1485    | At1g54780 | 3e-045 | 178 |
|                              | T1162    | At4g12110 | 2e-072 | 268 |
|                              |          | At4g22756 | 2e-068 | 255 |
|                              |          | At4g22753 | 6e-065 | 243 |
|                              | T1284    | At3g47400 | 4e-026 | 113 |
|                              |          | At2g45220 | 2e-026 | 148 |
|                              | T722     | At1g54500 | 2e-016 | 81  |
|                              | T758     | At4g01310 | 2e-049 | 191 |
|                              | T852     | At5g07020 | 6e-041 | 164 |
|                              | T767     | At4g01150 | 2e-038 | 155 |
|                              | CLPT5M7  | At4g02610 | 1e-033 | 139 |
|                              |          | At3g54640 | 1e-033 | 139 |
|                              | T1488    | At3g62770 | 6e-043 | 170 |
|                              |          | At3g56440 | 3e-032 | 135 |
|                              |          | At2g40810 | 1e-030 | 129 |
|                              | T1493    | At3g05090 | 1e-076 | 282 |
|                              | T567     | At1g78900 | 5e-060 | 228 |
|                              | T664     | At3g04870 | 8e-087 | 316 |
| <i>LeNAS (chloronerva)</i>   | T1084    | At4g25970 | 8e-079 | 289 |
| c1                           |          | At5g57190 | 1e-078 | 289 |
|                              | T1109    | At4g33630 | 4e-039 | 157 |
|                              | T1118    | At1g09830 | 2e-031 | 132 |
|                              | T1129    | At2g39780 | 1e-068 | 256 |
|                              | T1176    | At1g56700 | 5e-075 | 277 |
|                              | T1327    | At1g01300 | 2e-076 | 281 |
|                              |          | At3g61820 | 5e-068 | 254 |
|                              | T1471    | At2g23390 | 7e-064 | 240 |
|                              | T1485    | At1g54780 | 3e-045 | 178 |
|                              | T1488    | At3g62770 | 6e-043 | 170 |

|              |           |           |        |     |
|--------------|-----------|-----------|--------|-----|
|              |           | At3g56440 | 3e-032 | 135 |
|              |           | At2g40810 | 1e-030 | 129 |
|              | T1493     | At3g05090 | 1e-076 | 282 |
|              | T1557     | At2g14170 | 1e-074 | 276 |
|              | T1664     | At5g64380 | 3e-045 | 178 |
|              | T1669     | At5g49950 | 2e-080 | 295 |
|              |           | At1g34340 | 2e-072 | 268 |
|              | T1687     | At1g09430 | 6e-088 | 320 |
|              |           | At1g10670 | 3e-076 | 281 |
|              |           | At1g60810 | 2e-074 | 275 |
|              | CLET4E21  | At1g06680 | 8e-026 | 113 |
|              | CLPT1K7   | At5g13750 | 5e-072 | 267 |
|              |           | At5g13740 | 5e-063 | 237 |
|              |           | At3g43790 | 2e-054 | 209 |
|              | CLPT4B13  | At3g04820 | 2e-072 | 269 |
|              | CLPT5M7   | At4g02610 | 1e-033 | 139 |
|              |           | At3g54640 | 1e-033 | 139 |
|              | CTOC14I18 | At1g69120 | 4e-055 | 211 |
|              |           | At1g26310 | 2e-054 | 208 |
|              |           | At5g60910 | 4e-051 | 198 |
|              | T141      | At5g05010 | 2e-064 | 241 |
|              | T276      | At5g26710 | 3e-092 | 334 |
|              |           | At1g25350 | 4e-031 | 131 |
|              | T766      | At4g15510 | 3e-036 | 148 |
|              |           | At2g14110 | 5e-052 | 200 |
|              | T896      | At4g33670 | 8e-052 | 199 |
|              | T852      | At5g07020 | 6e-041 | 164 |
|              | T664      | At3g04870 | 8e-087 | 316 |
|              | T567      | At1g78900 | 5e-060 | 228 |
|              | T758      | At4g01310 | 2e-049 | 191 |
|              | T1752     | At5g13870 | 5e-055 | 210 |
|              |           | At2g06850 | 5e-052 | 200 |
|              | T1649     | At3g27890 | 1e-041 | 165 |
| <i>LeFER</i> | T1526     | At5g51550 | 1e-052 | 202 |
| c6           |           | At2g17230 | 4e-041 | 164 |
|              |           | At2g35150 | 1e-032 | 136 |
|              | T1456     | At5g13840 | 2e-036 | 149 |
|              | CLET5A4   | At5g61510 | 4e-047 | 183 |
|              | T1063     | At4g32060 | 3e-037 | 151 |
|              | T1563     | At3g10940 | 2e-066 | 249 |
|              | T1079     | At5g24400 | 4e-071 | 264 |
|              |           | At5g24420 | 3e-067 | 251 |
|              |           | At5g24410 | 2e-064 | 242 |
|              |           | At3g49360 | 5e-060 | 227 |
|              |           | At1g13700 | 3e-058 | 221 |
|              | CTOC8C8   | At5g20240 | 2e-058 | 222 |
|              | T1775     | At1g73090 | 3e-020 | 95  |
|              | CLEC9H23  | At1g72330 | 8e-034 | 139 |
|              | T1013     | At5g22330 | 1e-109 | 191 |
|              |           | At5g67630 | 4e-038 | 154 |
|              |           | At3g49830 | 3e-037 | 152 |
|              | CLET2L2   | At1g32470 | 4e-035 | 143 |
|              |           | At2g35370 | 7e-035 | 143 |
|              |           | At2g35120 | 6e-030 | 126 |
|              | T1587     | At4g30010 | 7e-026 | 113 |
|              | T1666     | At2g25530 | 2e-051 | 199 |
|              | CLET8I22  | At1g51510 | 3e-044 | 175 |
|              | CLET5C8   | At1g03150 | 3e-047 | 183 |
|              | T507      | At5g05690 | 2e-051 | 198 |
|              | T693      | At5g41480 | 5e-024 | 106 |

|  |      |           |        |     |
|--|------|-----------|--------|-----|
|  | T774 | At3g10980 | 4e-047 | 184 |
|  | T805 | At4g32260 | 4e-029 | 124 |
|  | T834 | At5g43860 | 4e-059 | 224 |
|  |      | At1g19670 | 3e-040 | 161 |
|  | T879 | At5g57020 | 1e-074 | 275 |
|  |      | At2g44170 | 2e-053 | 205 |
|  | T892 | At3g10920 | 6e-072 | 266 |
|  |      | At3g56350 | 2e-058 | 221 |
